# Supplementary material for: Genetic Diversity and Demographic History of Cajanus spp. Illustrated from Genome-Wide SNPs
Source: PubMed Central journal article supplement (PMC3922937; doi:10.1371/journal.pone.0088568), 2014-02-12
Supplement: pone.0088568.s001.pdf [file pone.0088568.s001.pdf]

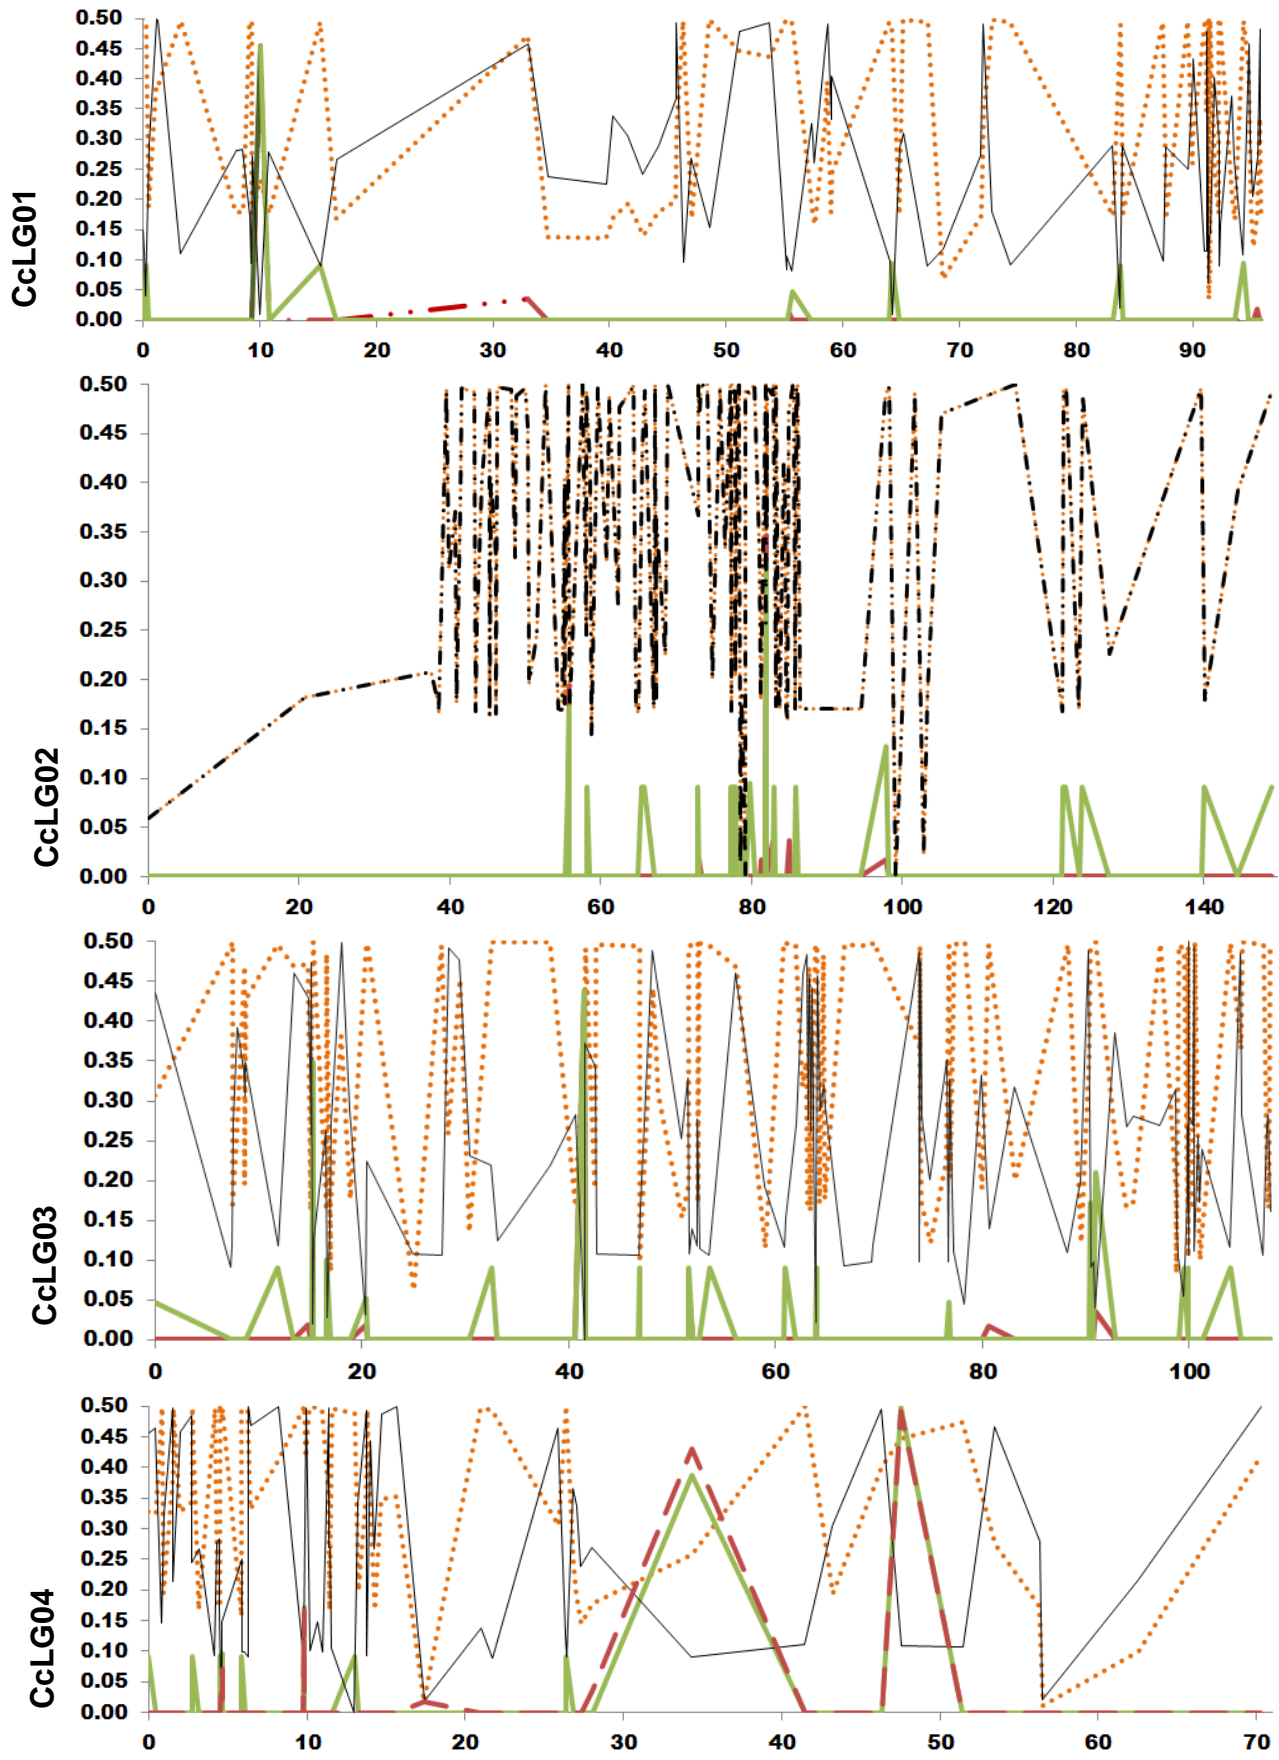

Cont.....

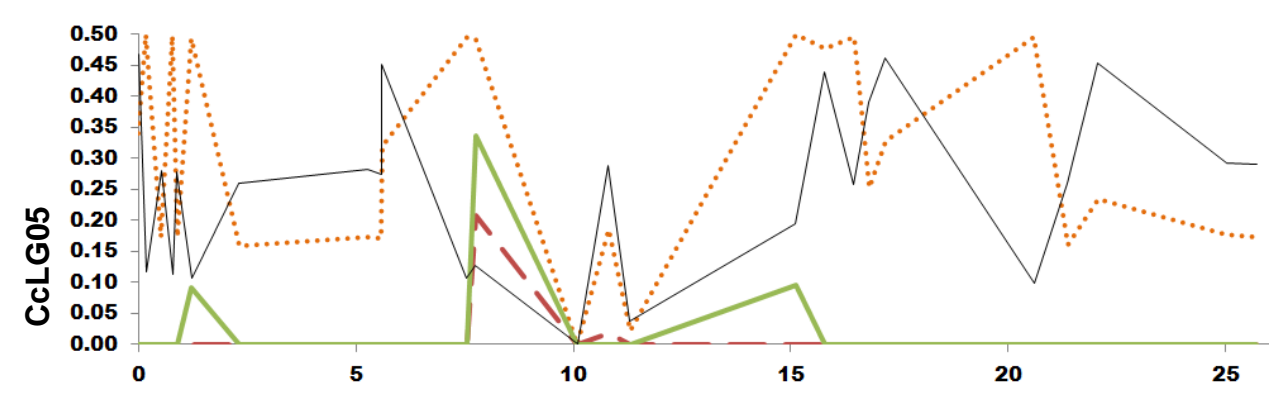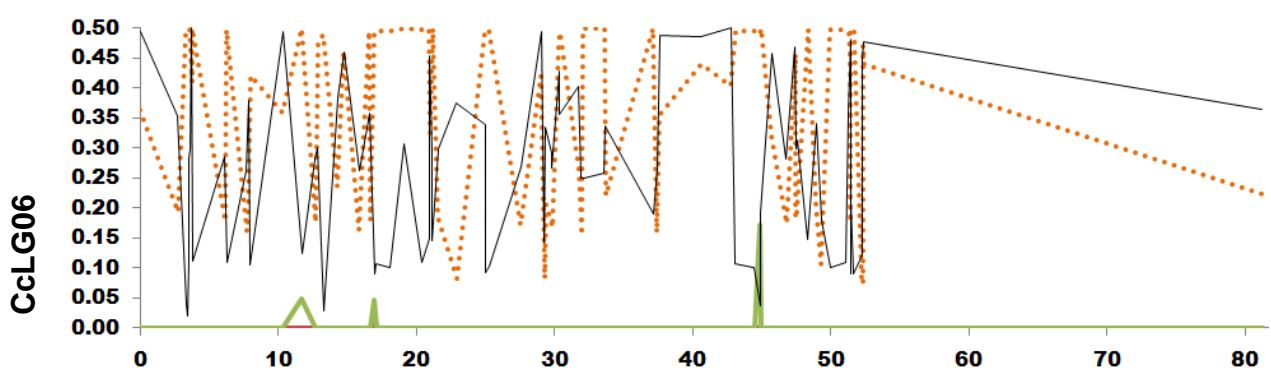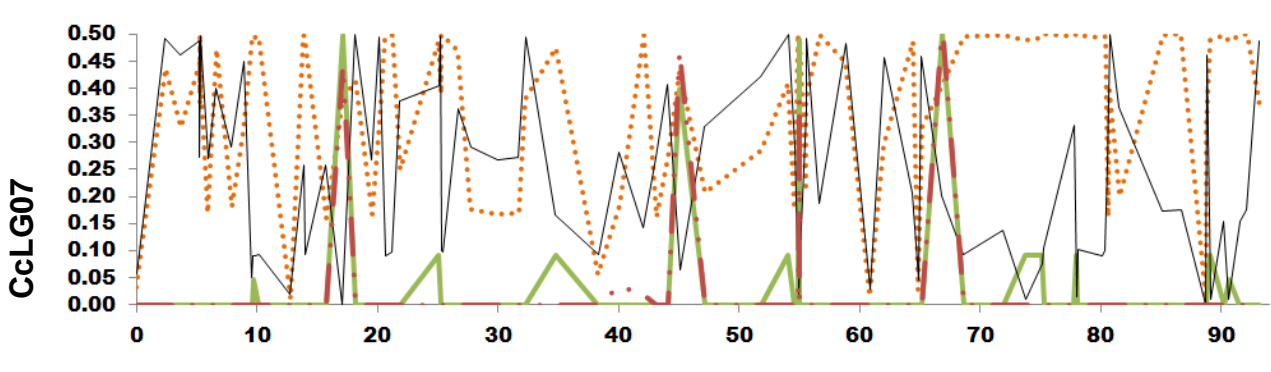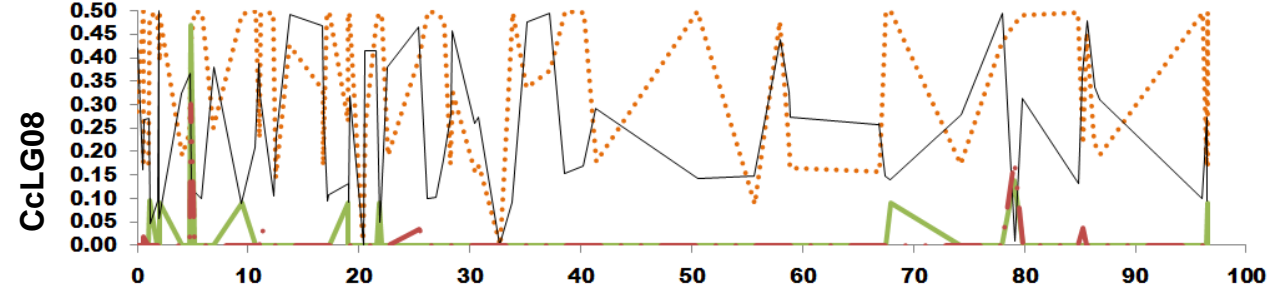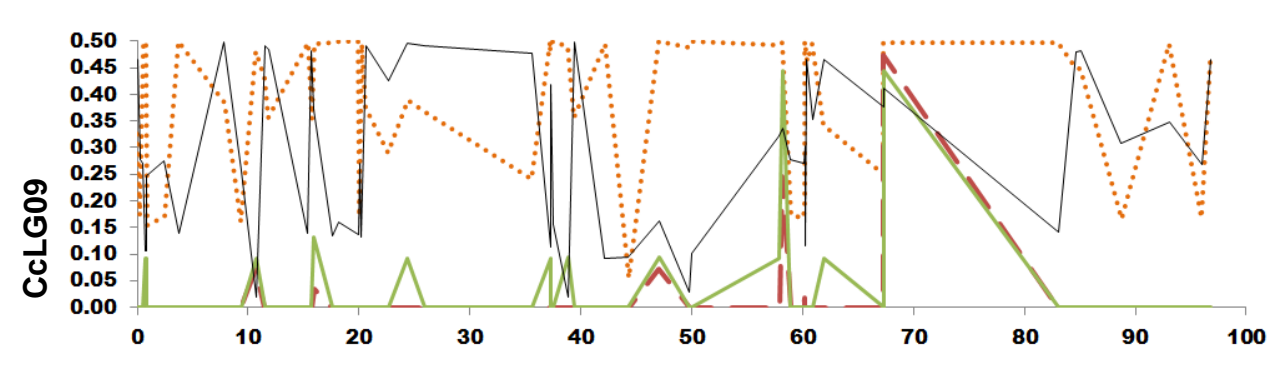

Cont.....

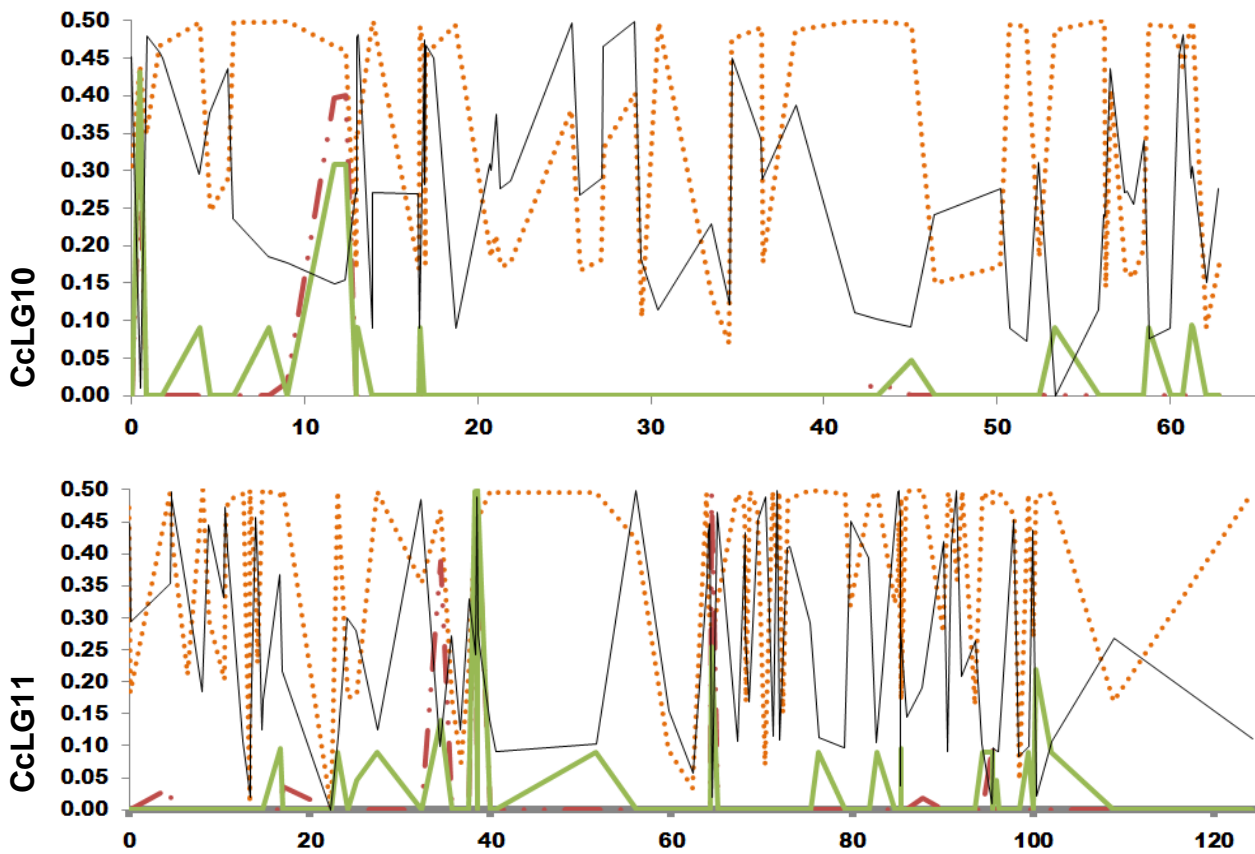

**Figure S1:** Estimated genome wide (CcLG01 to CcLG11) gene diversity using 875 mapped loci. “X” axis represents the length of each linkage group (CcLG) in cM and “Y” axis represents the value of gene diversity.

- Gene diversity across 184 *Cajanus* accessions
- Gene diversity across 56 breeding lines
- Gene diversity across 21 landraces
- Gene diversity across 107 wilds
