# Supplementary material for: Genetic Diversity and Demographic History of Cajanus spp. Illustrated from Genome-Wide SNPs
Source: PLoS One. 2014 Feb 12;9(2):e88568. doi: 10.1371/journal.pone.0088568 (PMC3922937; doi:10.1371/journal.pone.0088568)
Supplement: Table S3 — Diversity in breeding lines, landraces and wild relatives. (XLSX) [file pone.0088568.s006.xlsx]

## Sheet: Table S3
Table S3: Diversity in breeding lines, landraces and wild rlatives
Population	Sample size		N	Na	Ne	I	Ho	He	UHe	F	%P
Breeding Lines	56	Mean	55.454	1.083	1.034	0.03	0.01	0.02	0.02	0.513	0.0829
		SE	0.031	0.007	0.004	0.003	0.002	0.002	0.002	0.015
Landraces	21	Mean	20.824	1.13	1.043	0.043	0.01	0.027	0.027	0.736	0.13
		SE	0.015	0.008	0.004	0.003	0.002	0.002	0.002	0.013
Wilds (pooled)	107	Mean	65.39	1.737	1.317	0.314	0.011	0.2	0.202	0.929	0.7376
		SE	1.034	0.011	0.008	0.006	0.001	0.004	0.004	0.005
